# Supplementary material for: Determination of Some Isoquinoline Alkaloids in Extracts Obtained from Selected Plants of the Ranunculaceae, Papaveraceae and Fumarioideae Families by Liquid Chromatography and In Vitro and In Vivo Investigations of Their Cytotoxic Activity
Source: MDPI journal article supplement (doi:10.3390/molecules28083503), 2023-04-16
Supplement: s1 [file s1]

described previously [20,42].

(A)

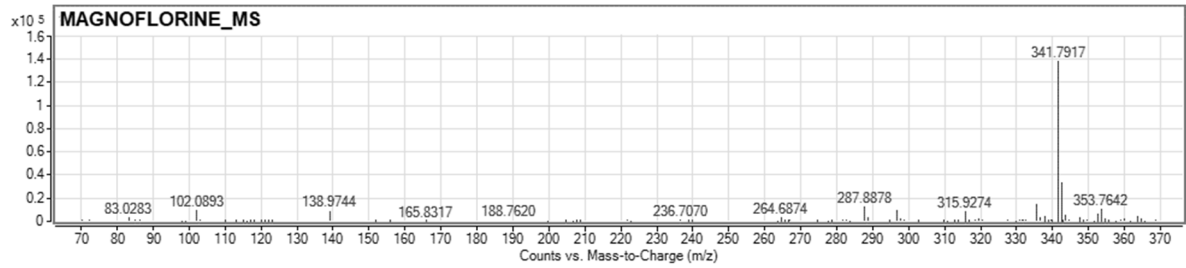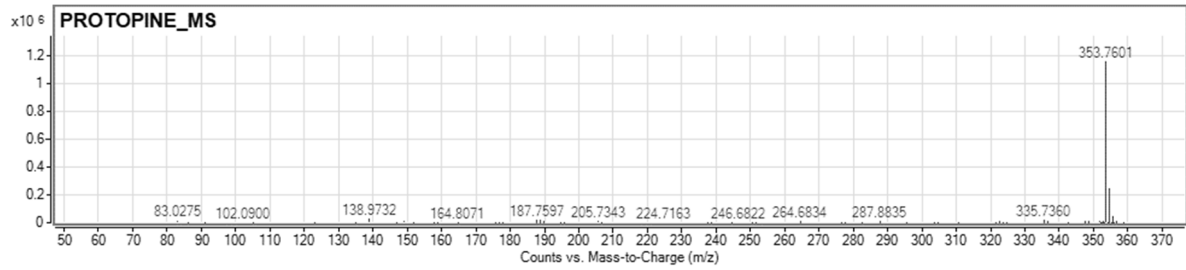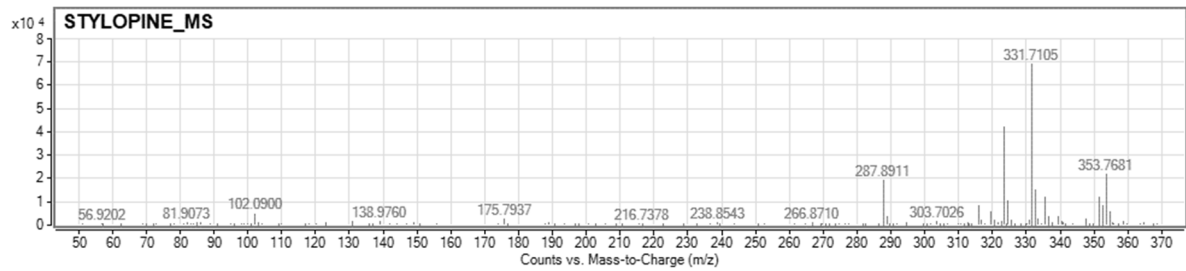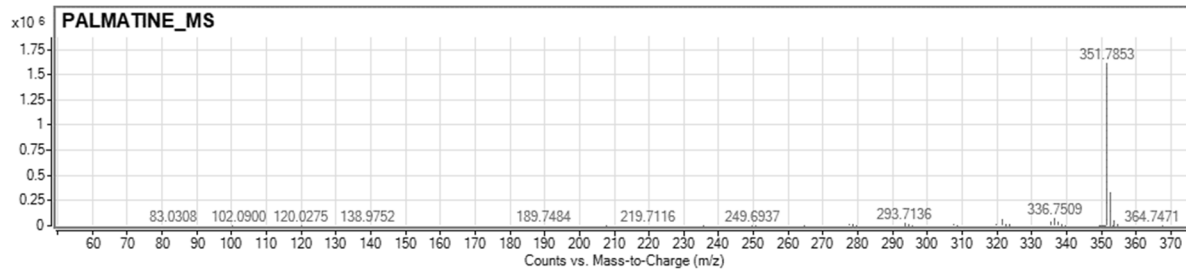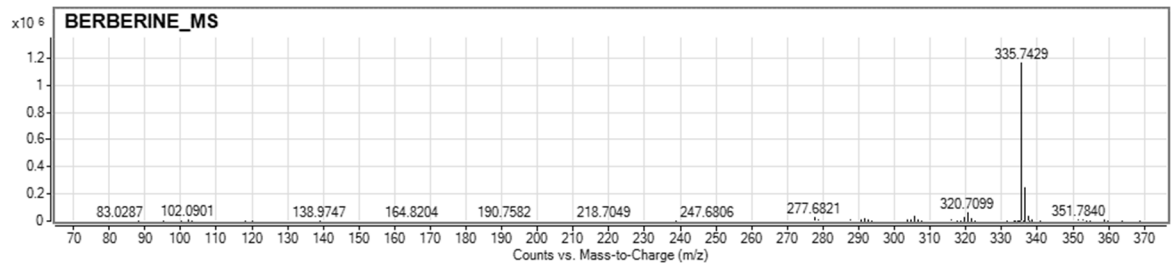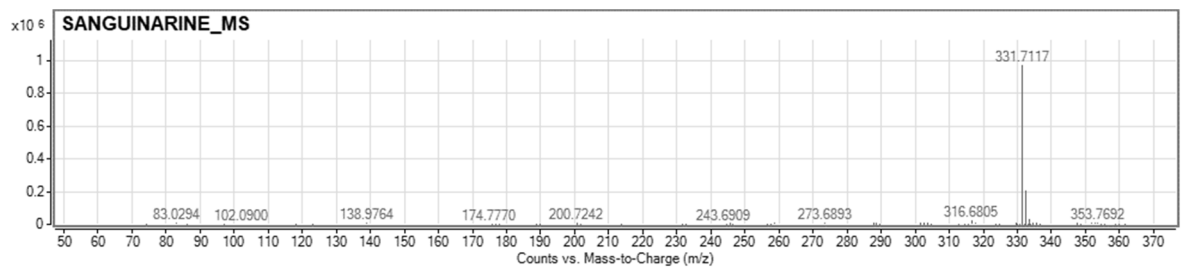

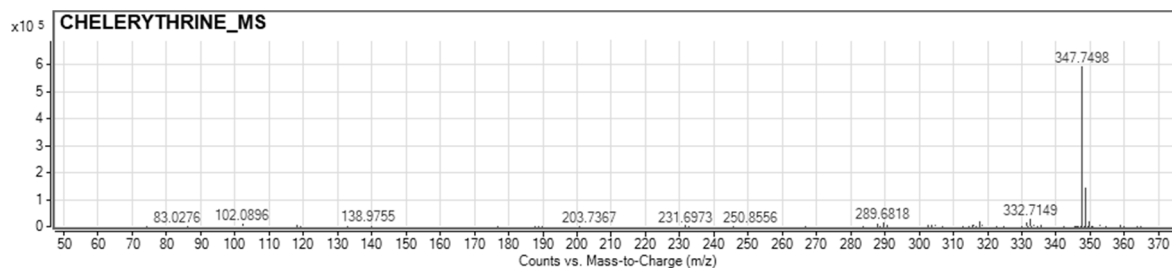

(B)

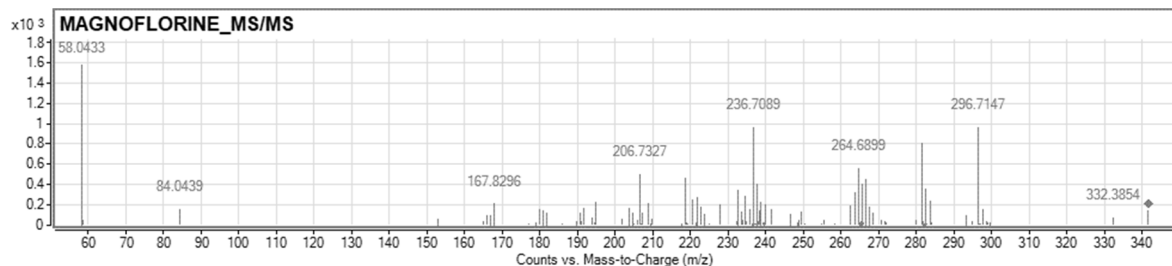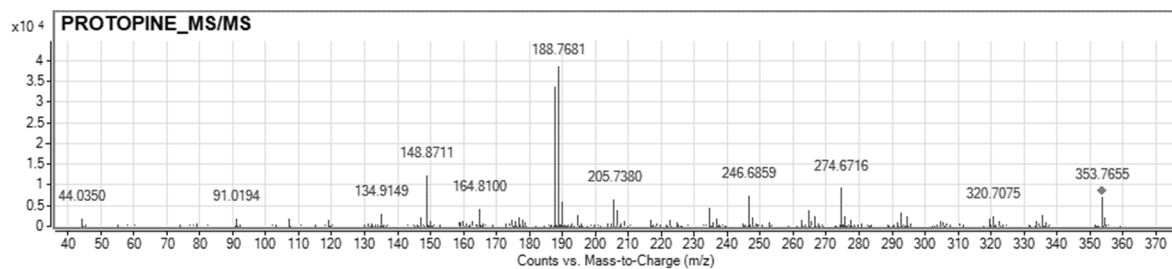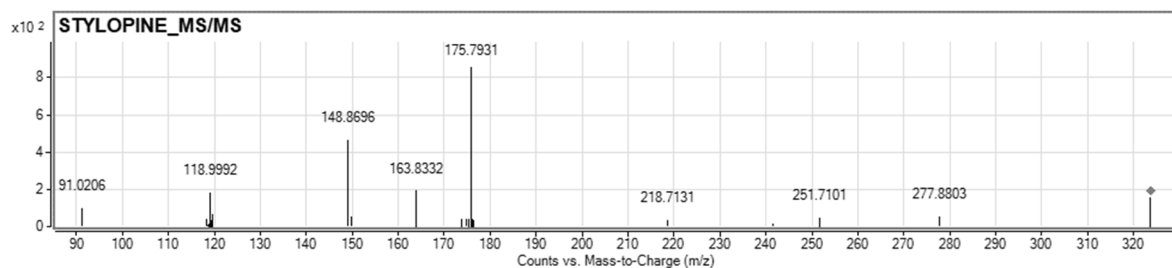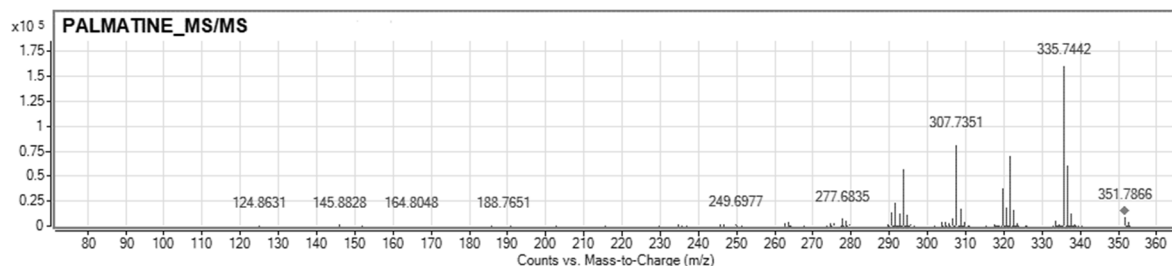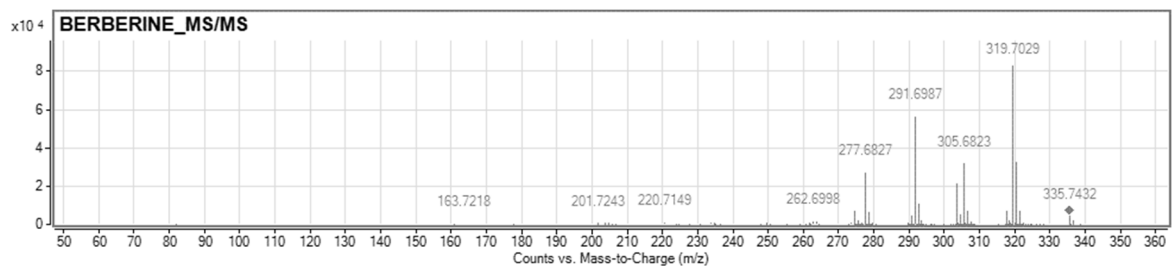

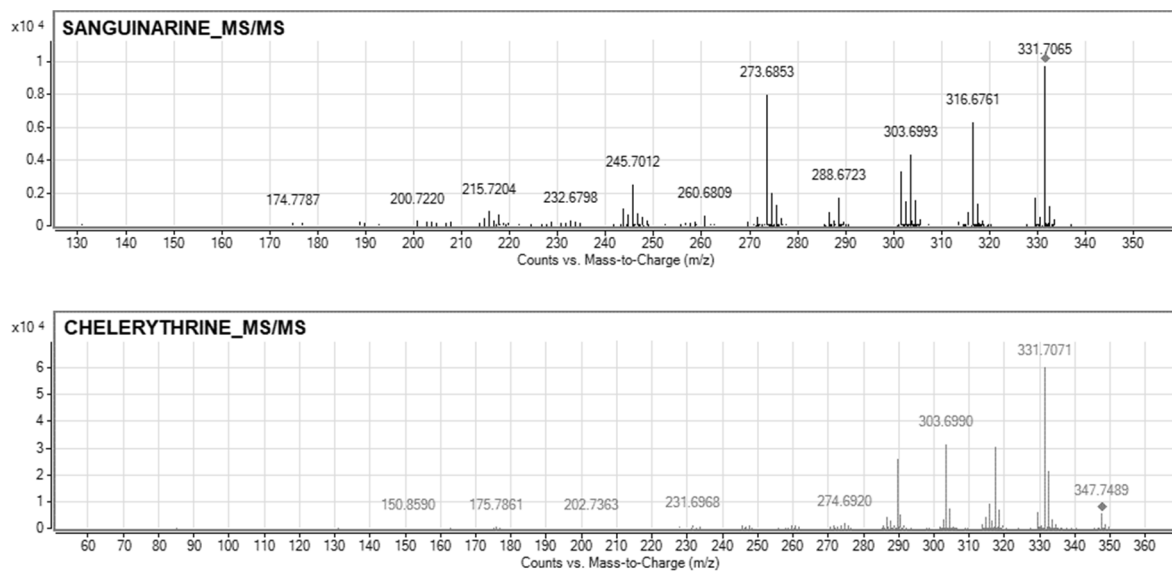

**Figure S1.** Representative MS (A) and MS/MS (B) spectra for the studied alkaloids obtained from *Lamprocapnos spectabilis* herb.
